# Supplementary material for: A small molecule regulator of tissue transglutaminase conformation inhibits the malignant phenotype of cancer cells
Source: PubMed Central journal article supplement (PMC6188150; doi:10.18632/oncotarget.26193), 2018-09-28
Supplement: oncotarget-09-34379-s001.pdf [file oncotarget-09-34379-s001.pdf]

# A small molecule regulator of tissue transglutaminase conformation inhibits the malignant phenotype of cancer cells

## SUPPLEMENTARY MATERIALS

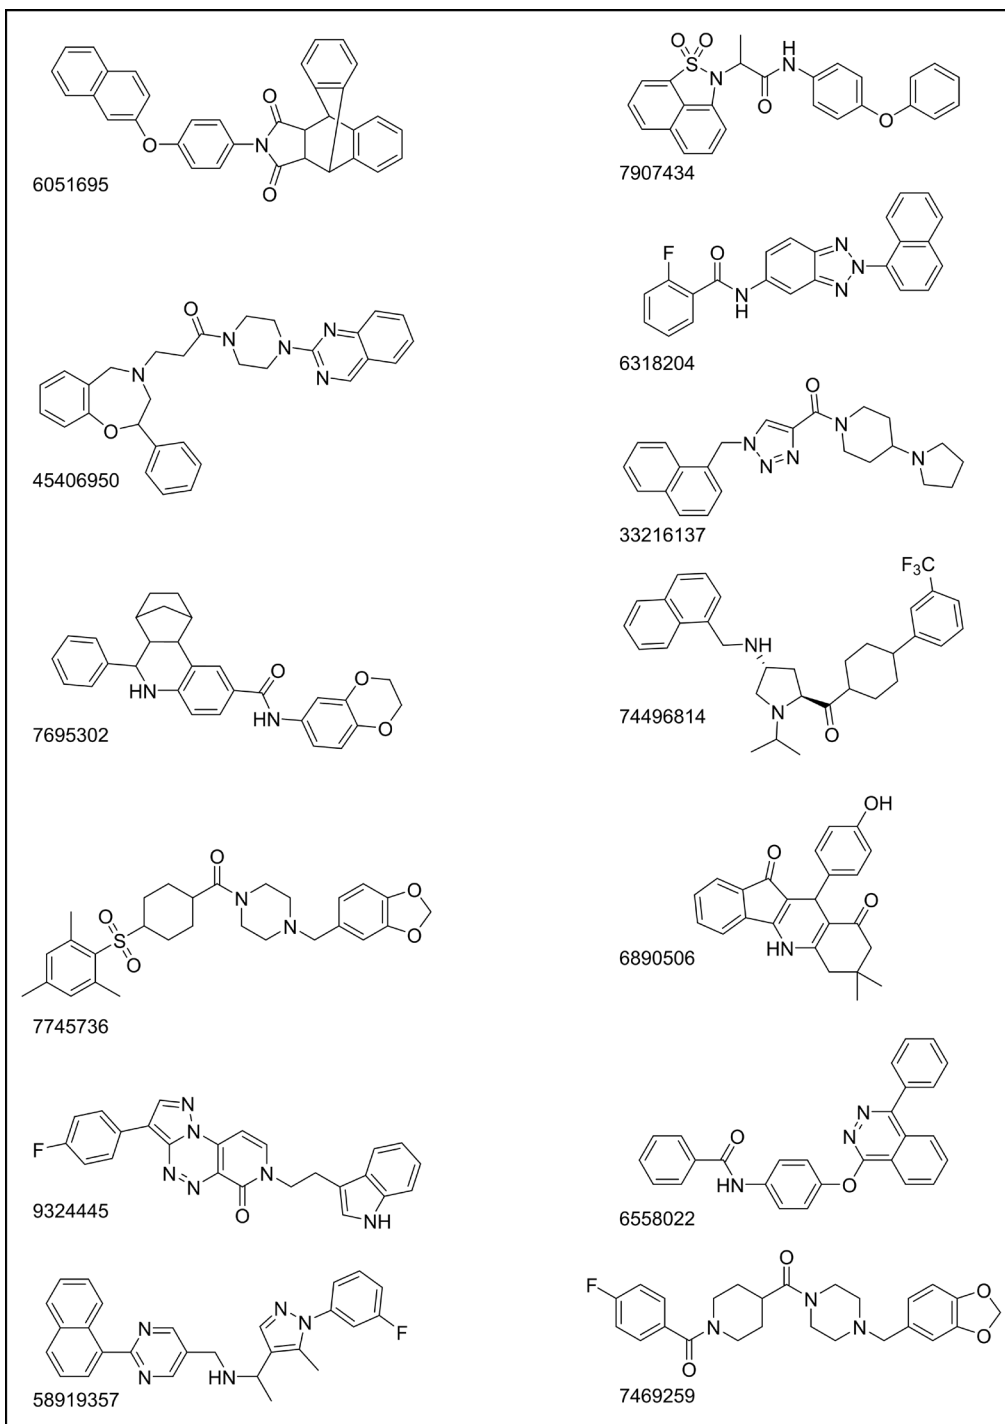

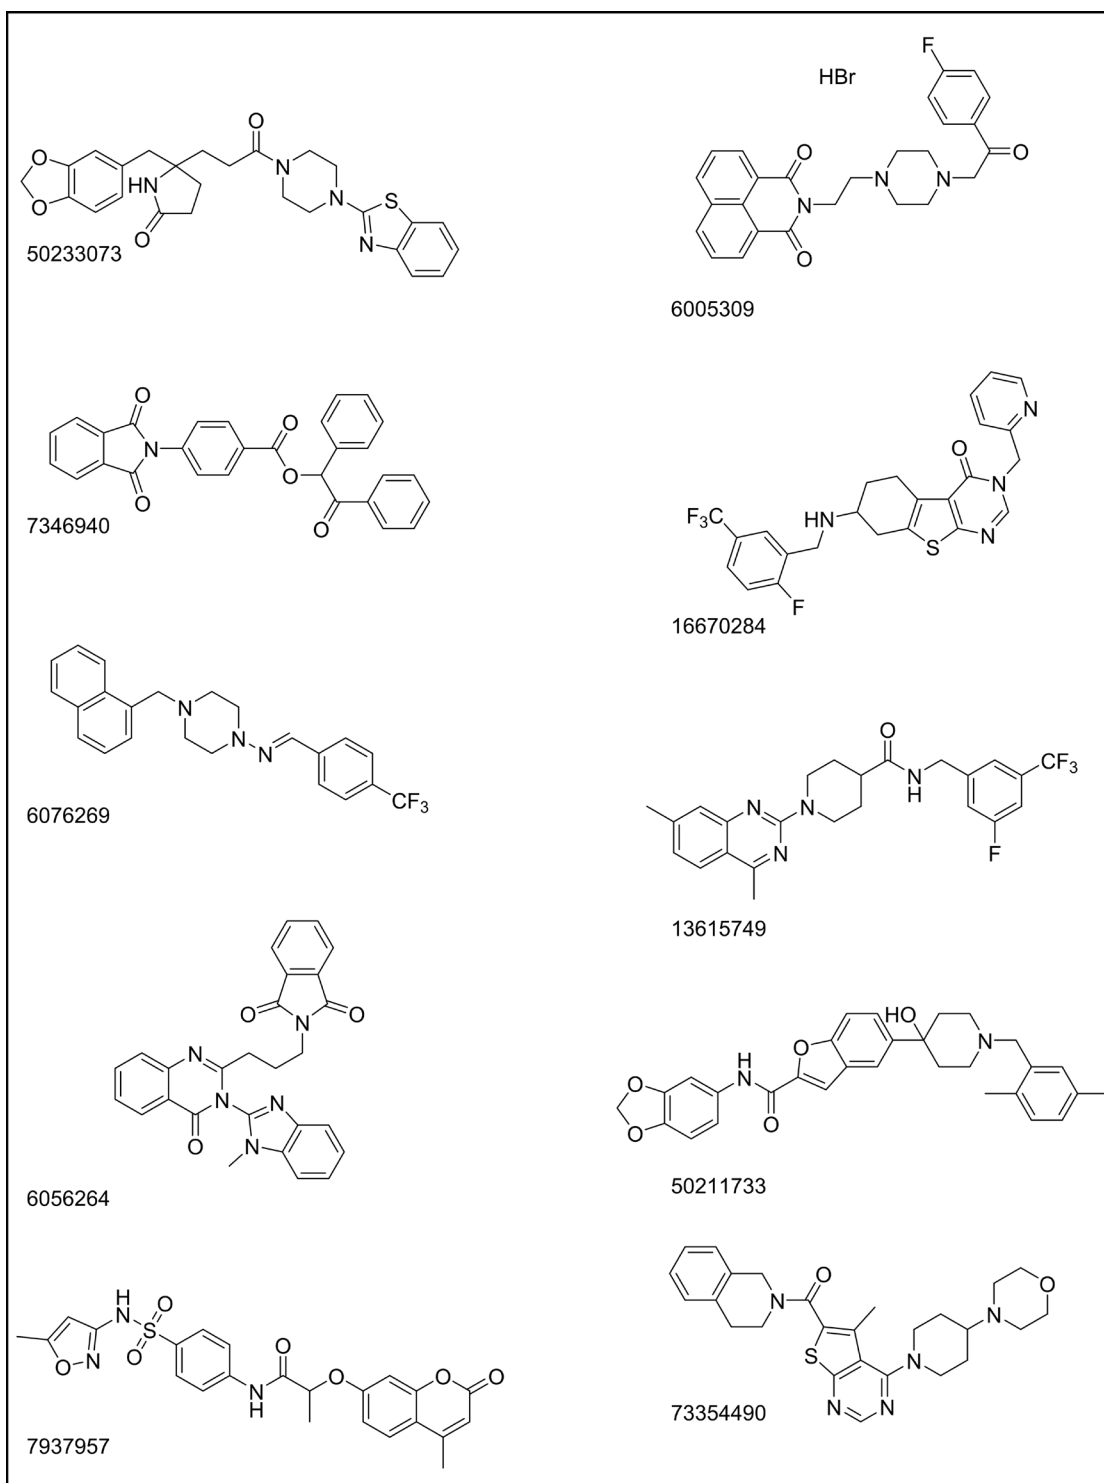

**Supplementary Figure 1: The different molecules that potentially bind open state tTG.** Our virtual screen identified 24 molecules that could preferentially dock onto open state tTG. The structure and corresponding ChemBridge catalog number of each molecule is shown. Compounds in the manuscript are designated TTGM #, where # is the final four digits of each compound's catalog code.
